# Supplementary material for: Screening of Aptamers That Bind to the Multivalent Aminoglycoside Amikacin
Source: Preprints.org preprint supplement (doi:10.20944/preprints202108.0493.v1), 2021-08-25
Supplement: Supplementary file 1 [file supplementary]

**Supplemental Data**

**Figure Legend**

**Figure1S.** Immobilization of amikacin on epoxy-activated porous glass measured after each round. % immobilization =(the amount of the immobilized amikacin on the bed)/ (the amount of the applied amikacin to the column)x 100.

**Figure 2S.** Enrichment profile of the ssRNA pool measured the % binding after each round. % binding =(the amount of the bound ssRNAs)/ (the amount of the applied ssRNAs to the column)x 100.
